# Supplementary material for: Profile and functional analysis of small RNAs derived from Aspergillus fumigatus infected with double-stranded RNA mycoviruses
Source: PubMed Central journal article supplement (PMC5450132; doi:10.1186/s12864-017-3773-8), 2017-05-30

### CV\_free

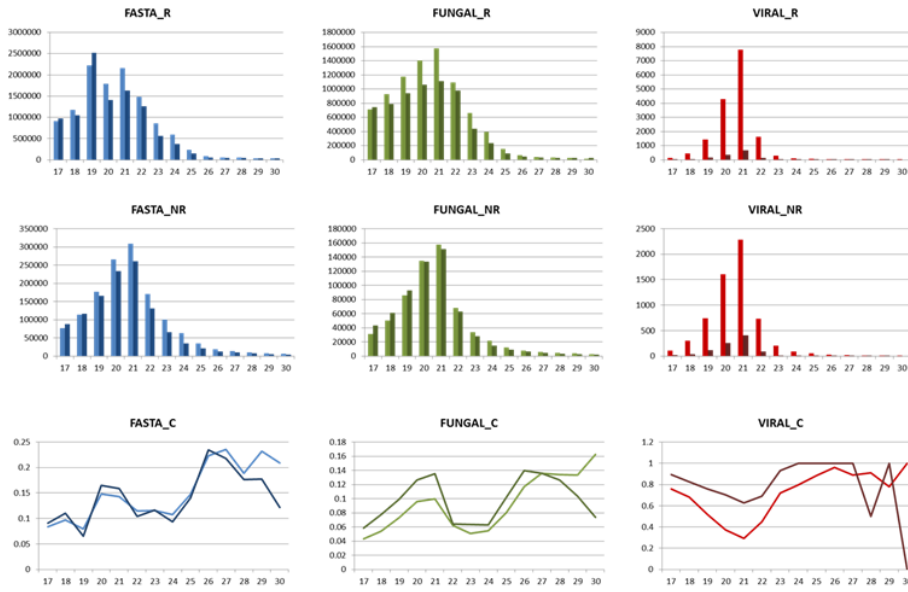

### CV\_infected

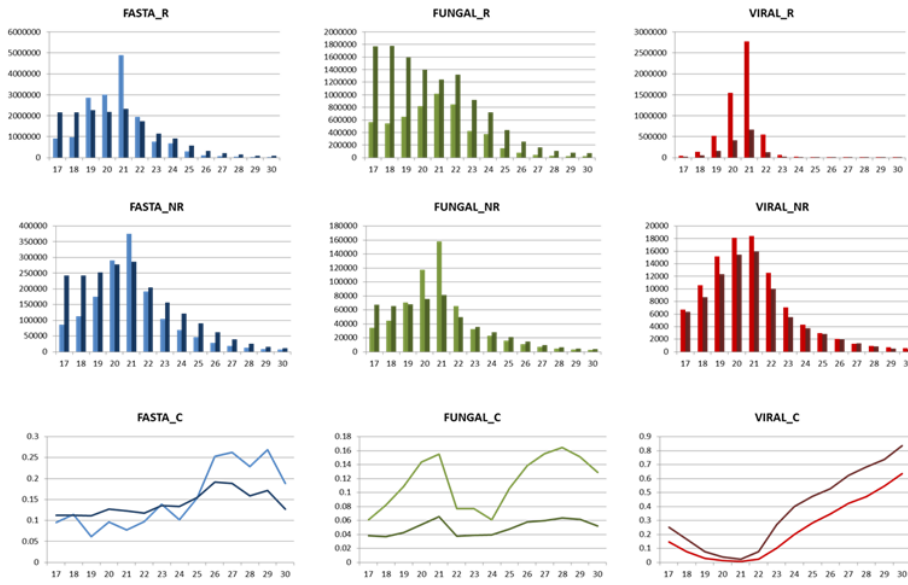

### NK\_free

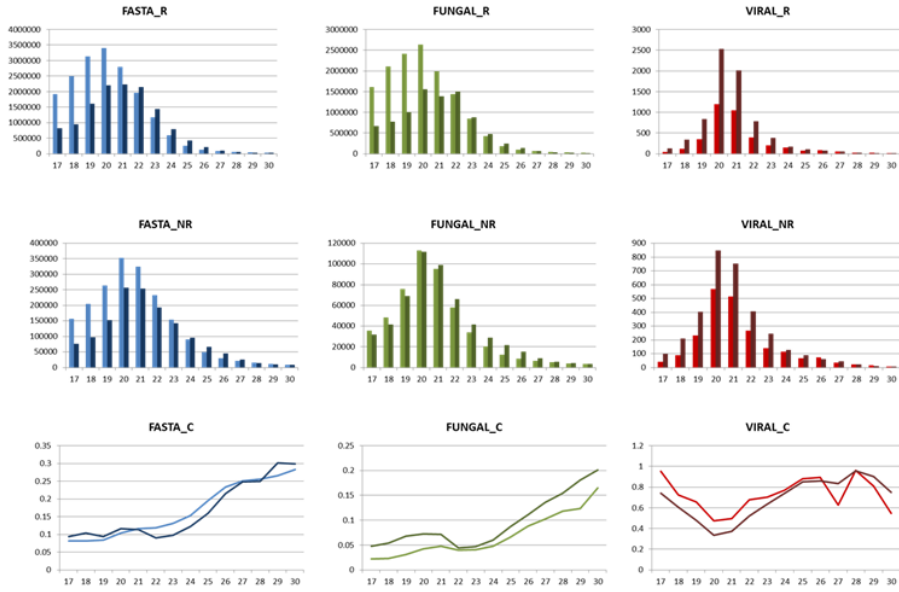

### NK\_infected

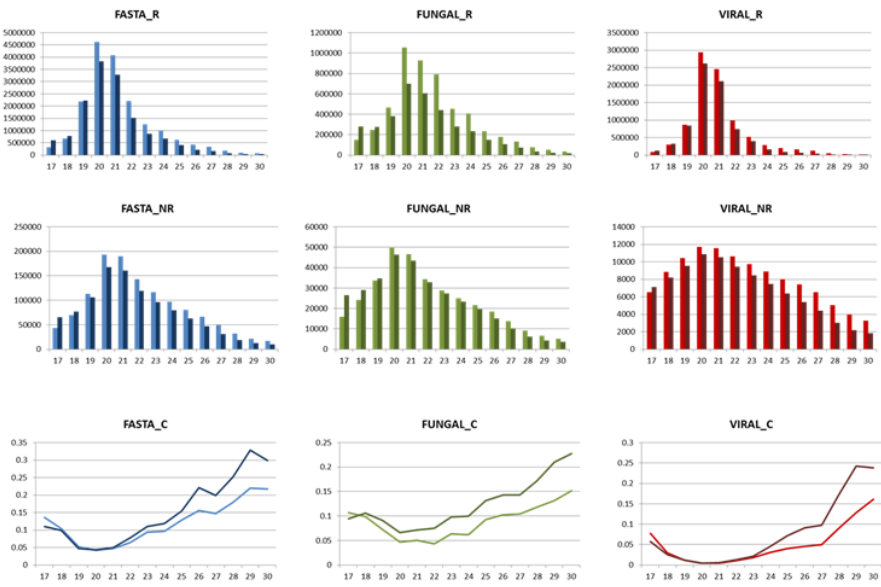

### PV\_free

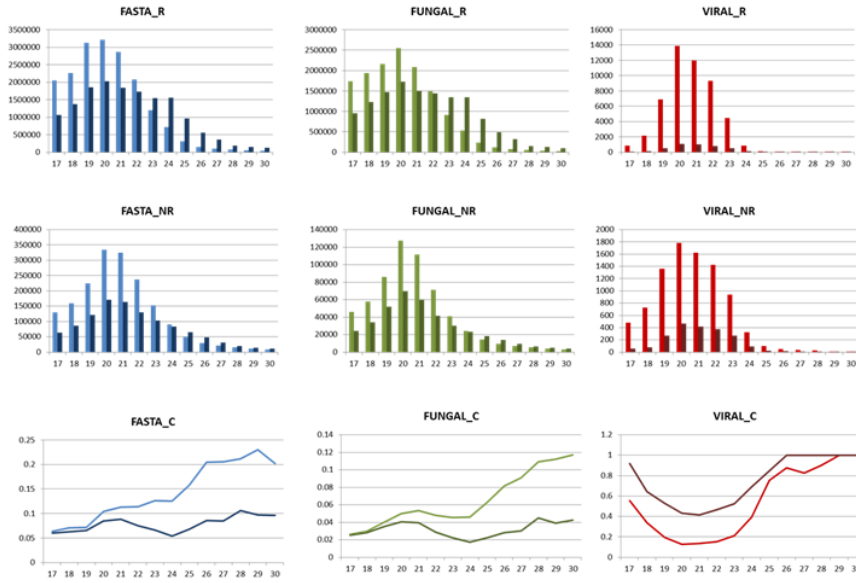

### PV\_infected

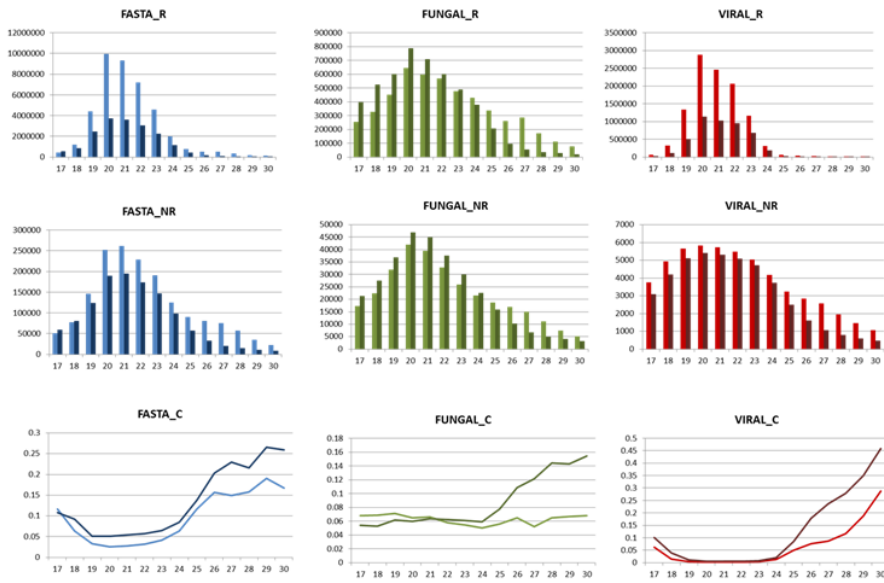

Supplement: 12864_2017_3773_MOESM1_ESM.pdf [file 12864_2017_3773_MOESM1_ESM.pdf]
