# Supplementary material for: Profile and functional analysis of small RNAs derived from Aspergillus fumigatus infected with double-stranded RNA mycoviruses
Source: PubMed Central journal article supplement (PMC5450132; doi:10.1186/s12864-017-3773-8), 2017-05-30

### CV free

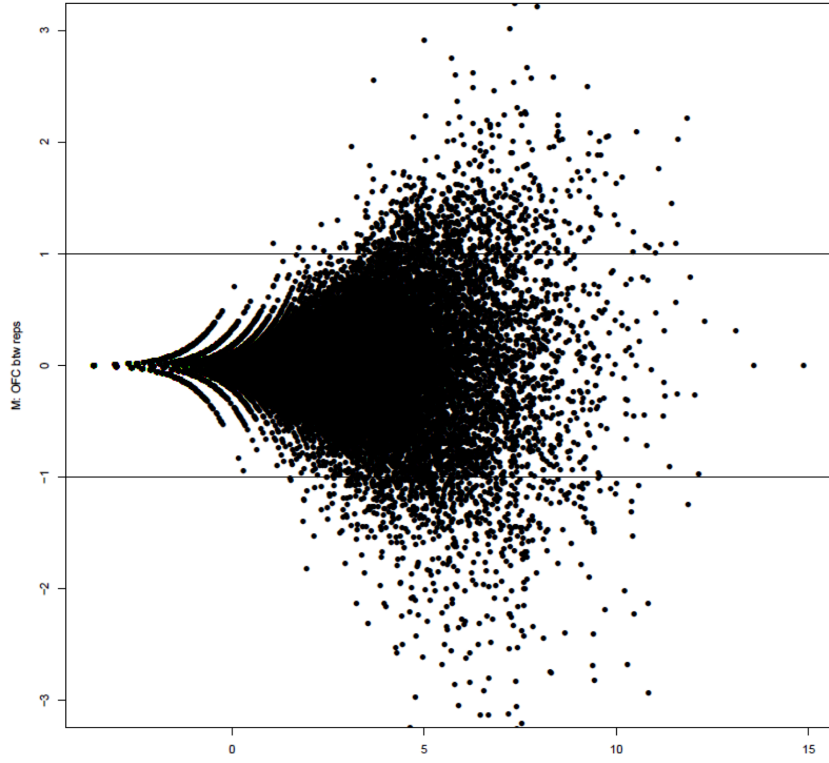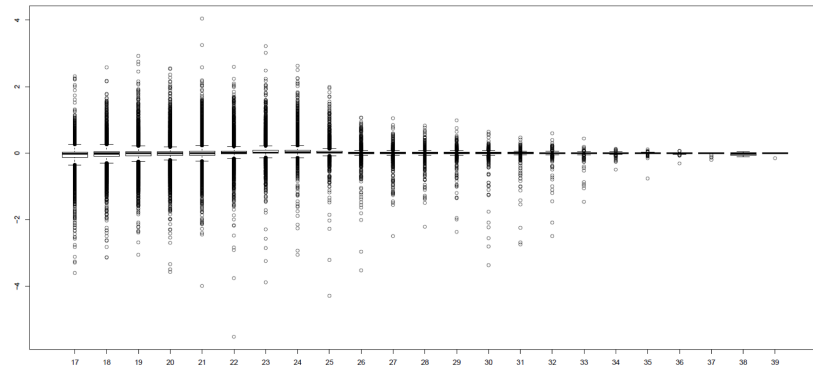

### CV infected

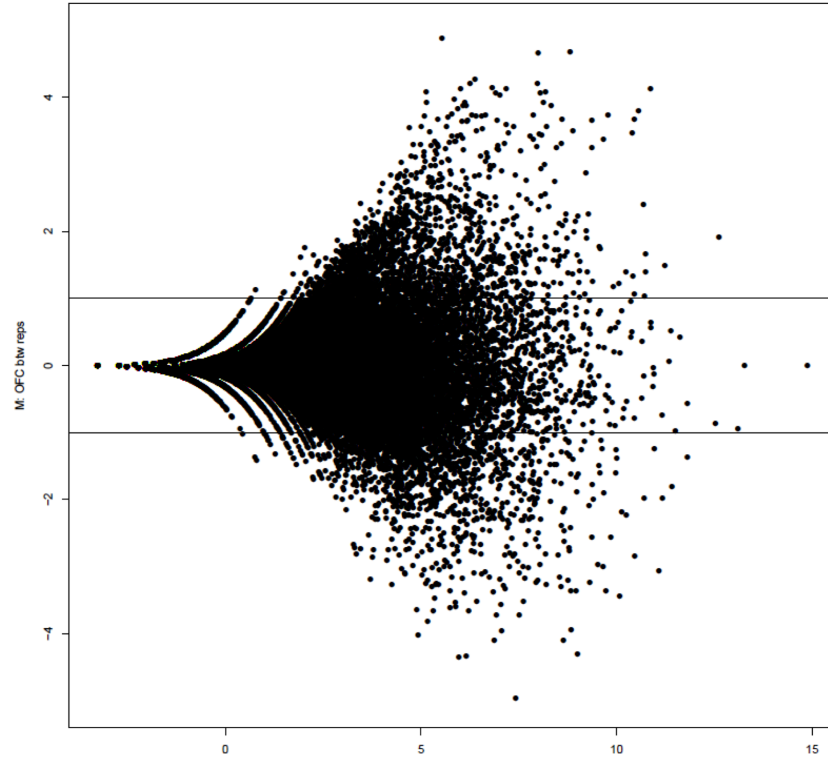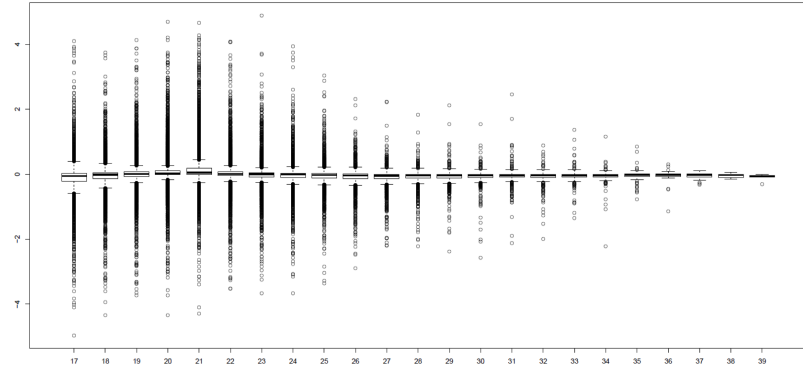

### NK free

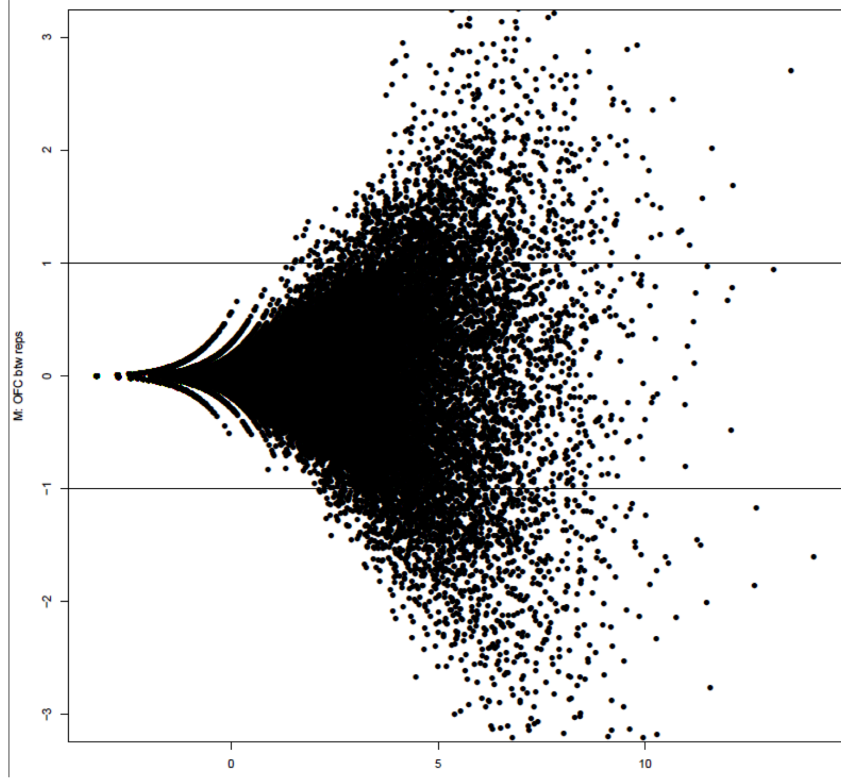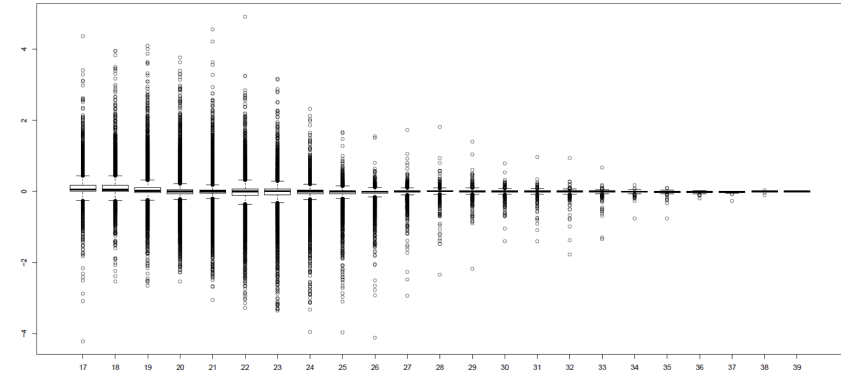

### NK infected

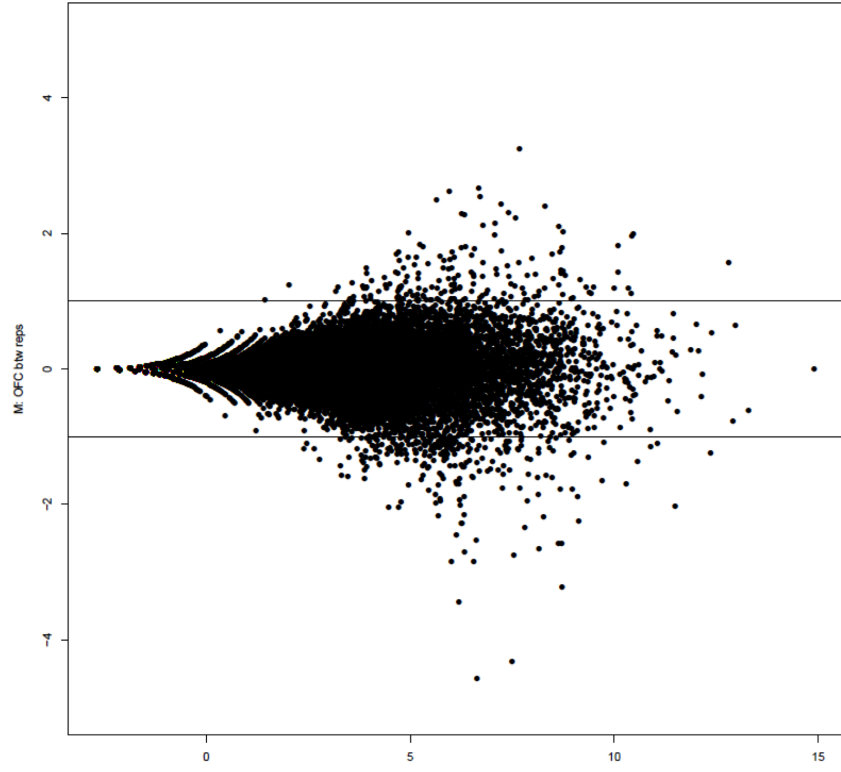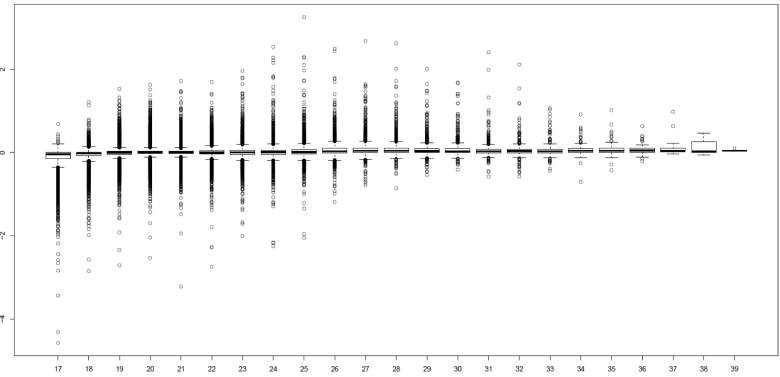

### PV free

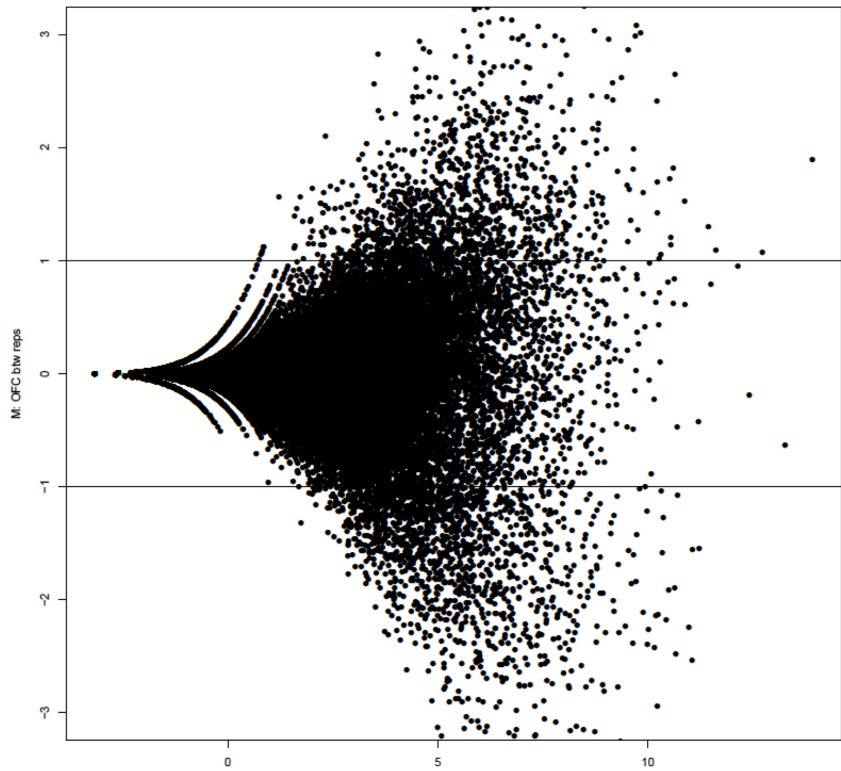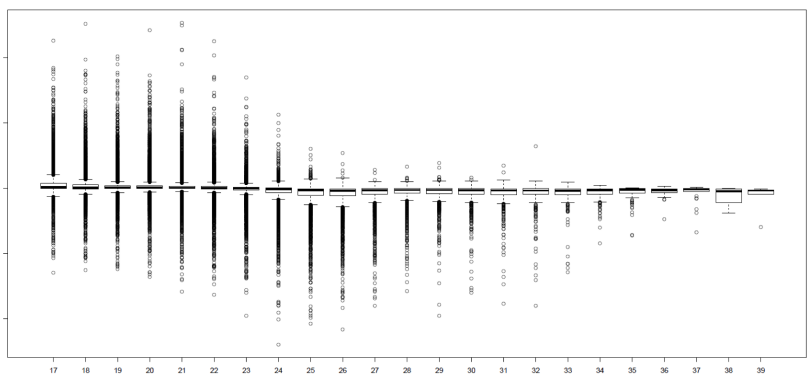

### PV infected

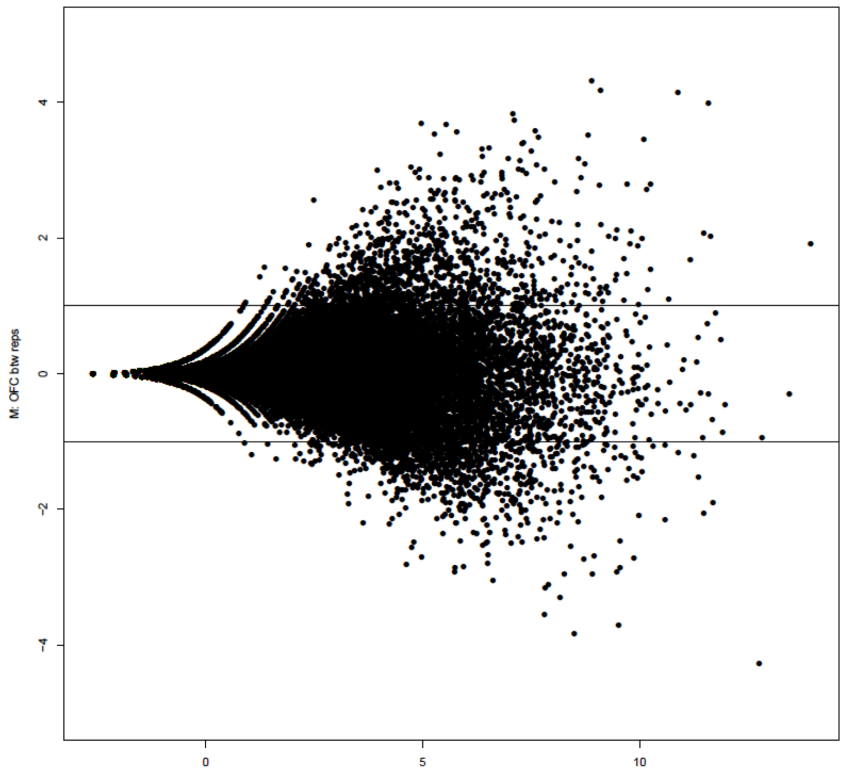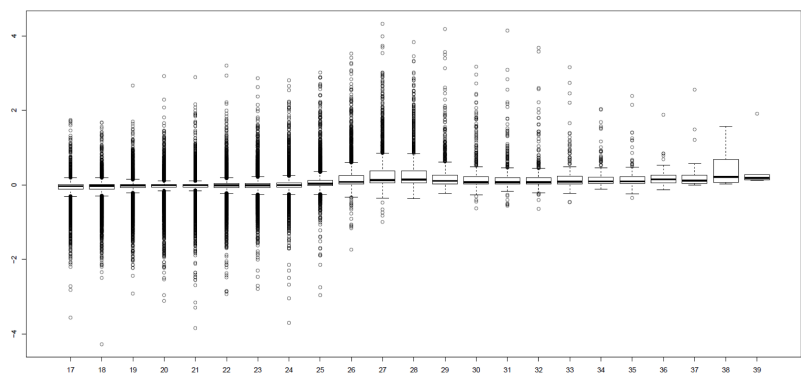

Supplement: 12864_2017_3773_MOESM2_ESM.pdf [file 12864_2017_3773_MOESM2_ESM.pdf]
