# Supplementary material for: Profile and functional analysis of small RNAs derived from Aspergillus fumigatus infected with double-stranded RNA mycoviruses
Source: PubMed Central journal article supplement (PMC5450132; doi:10.1186/s12864-017-3773-8), 2017-05-30

# A.1

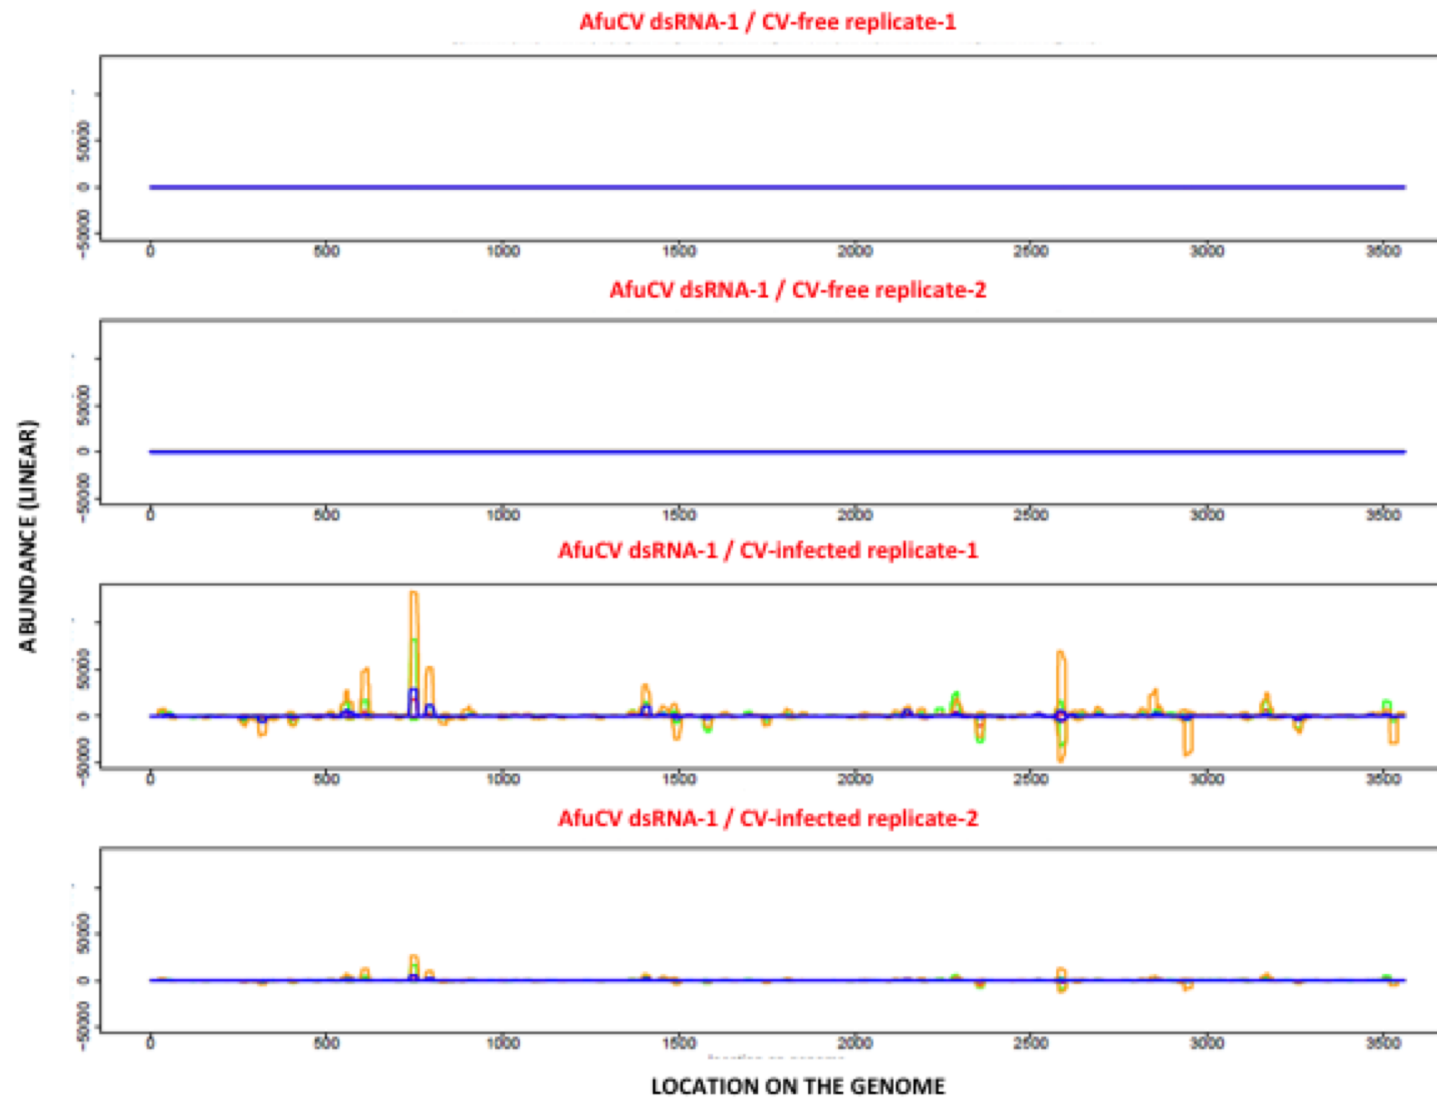

## A.2

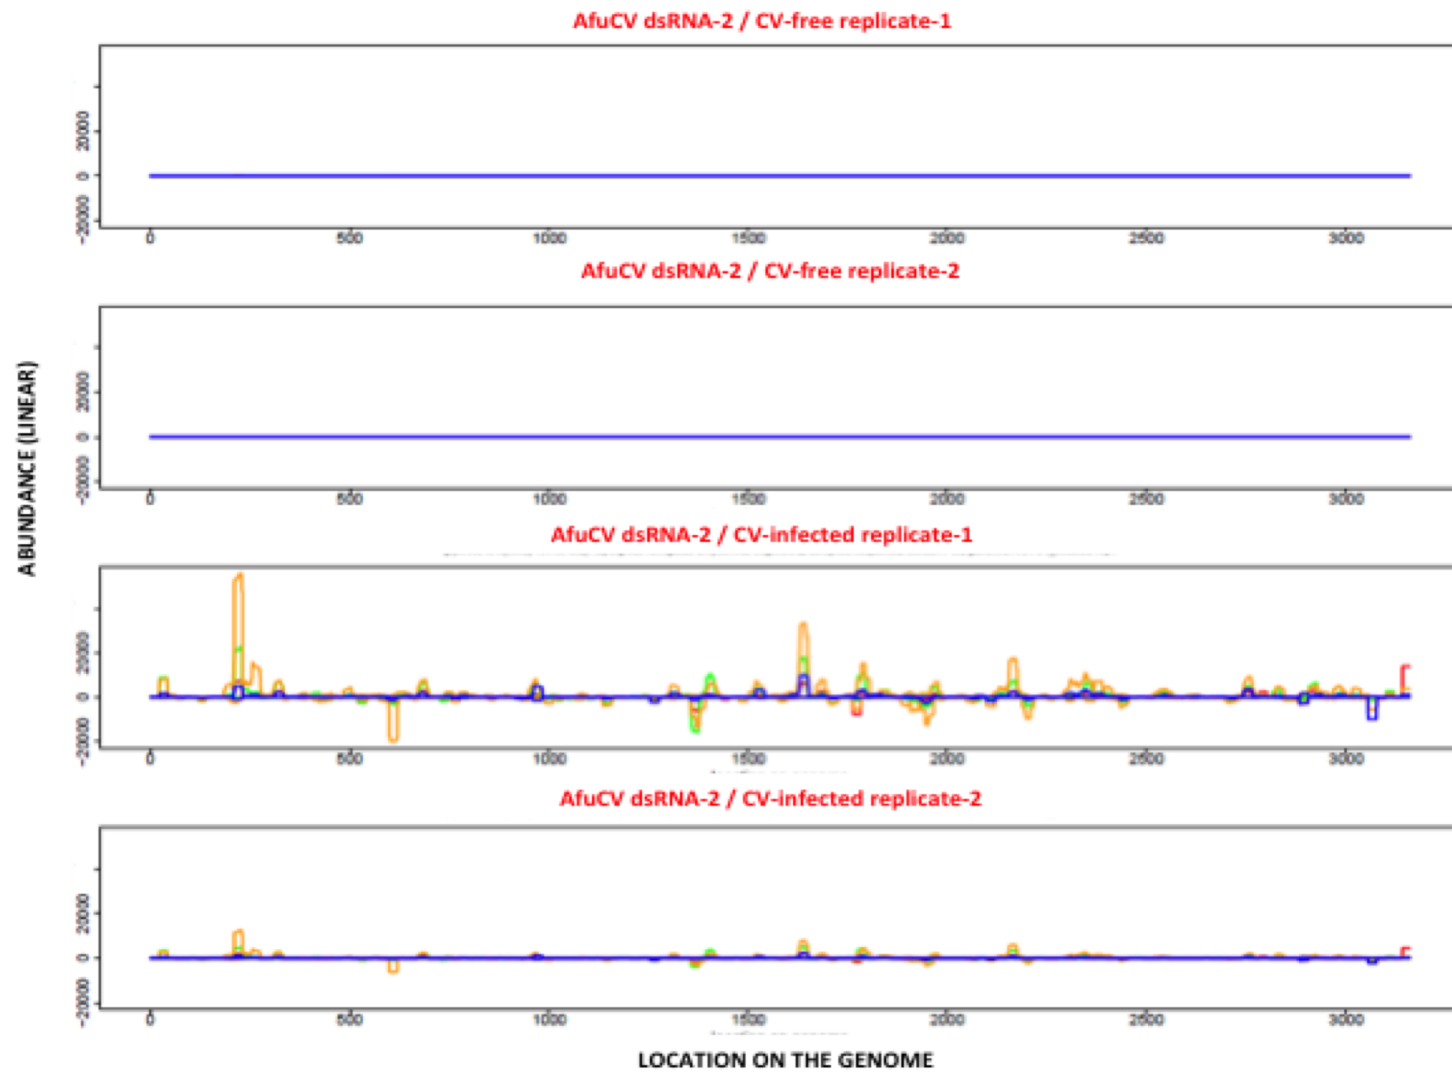

### A.3

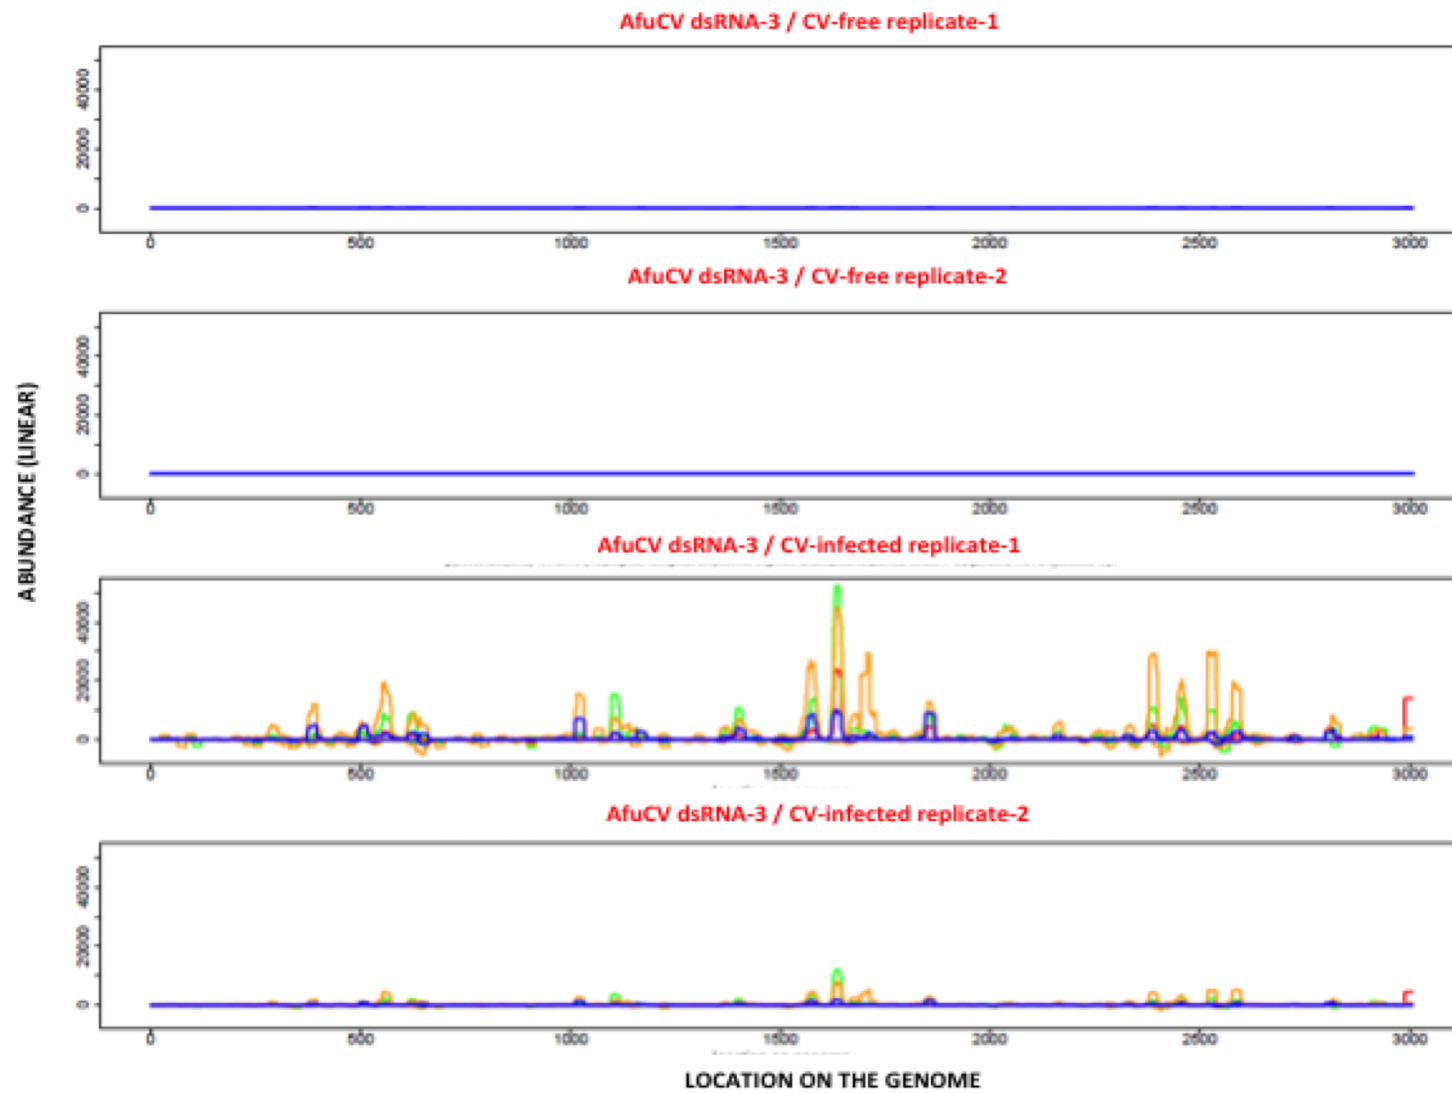

## A.4

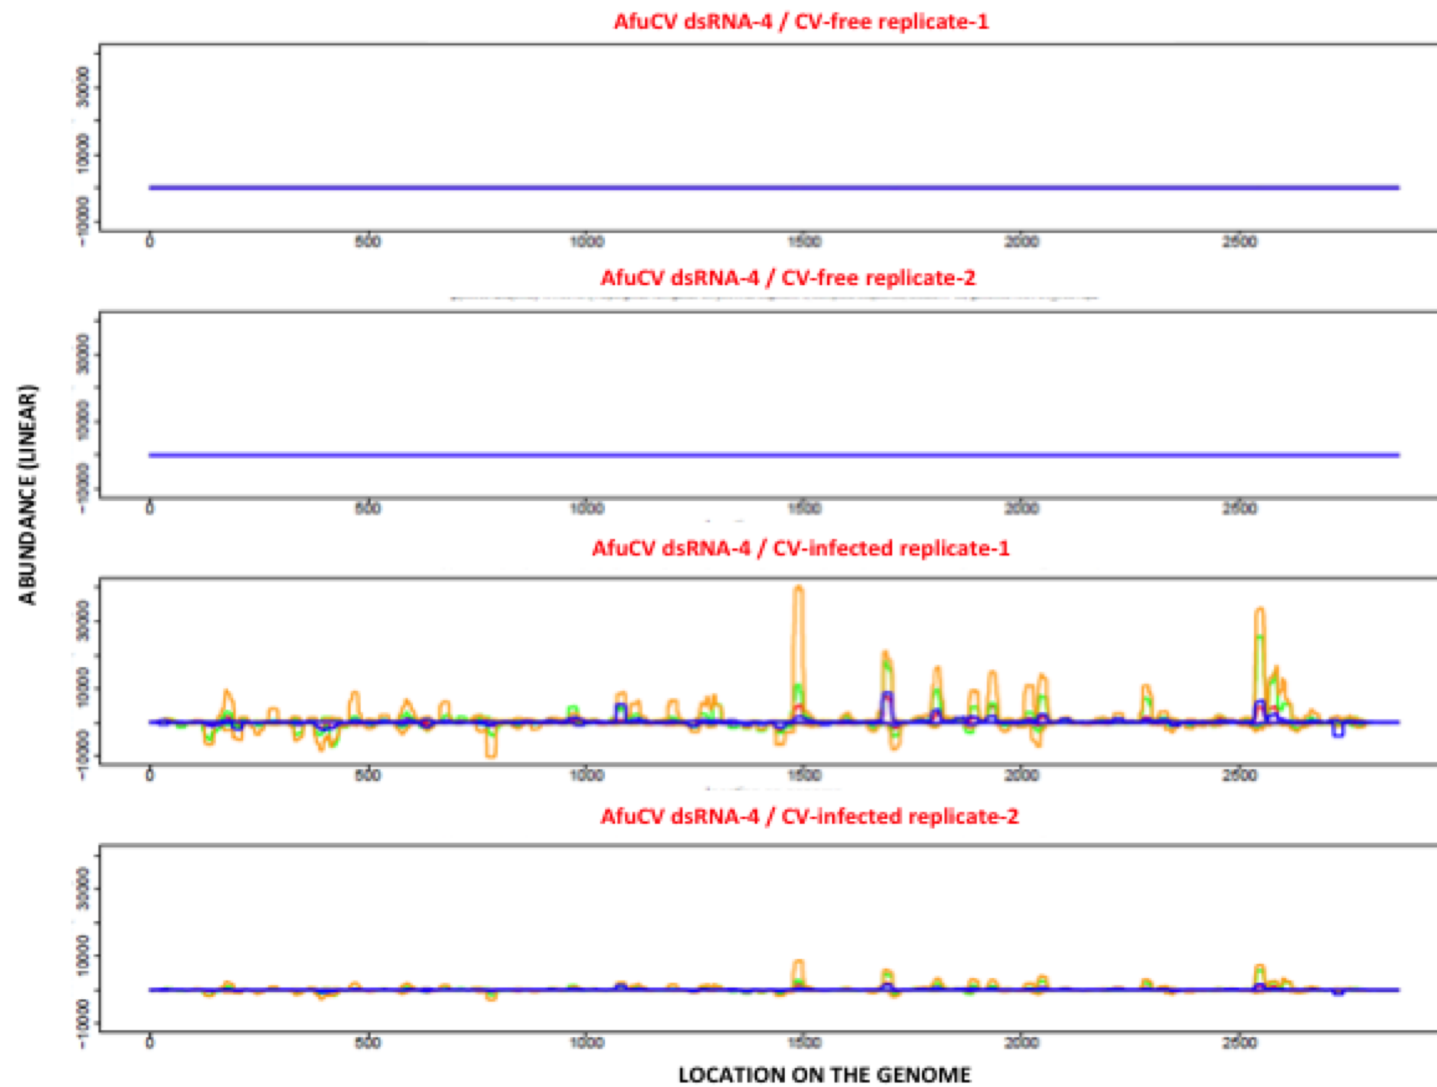

## B.1

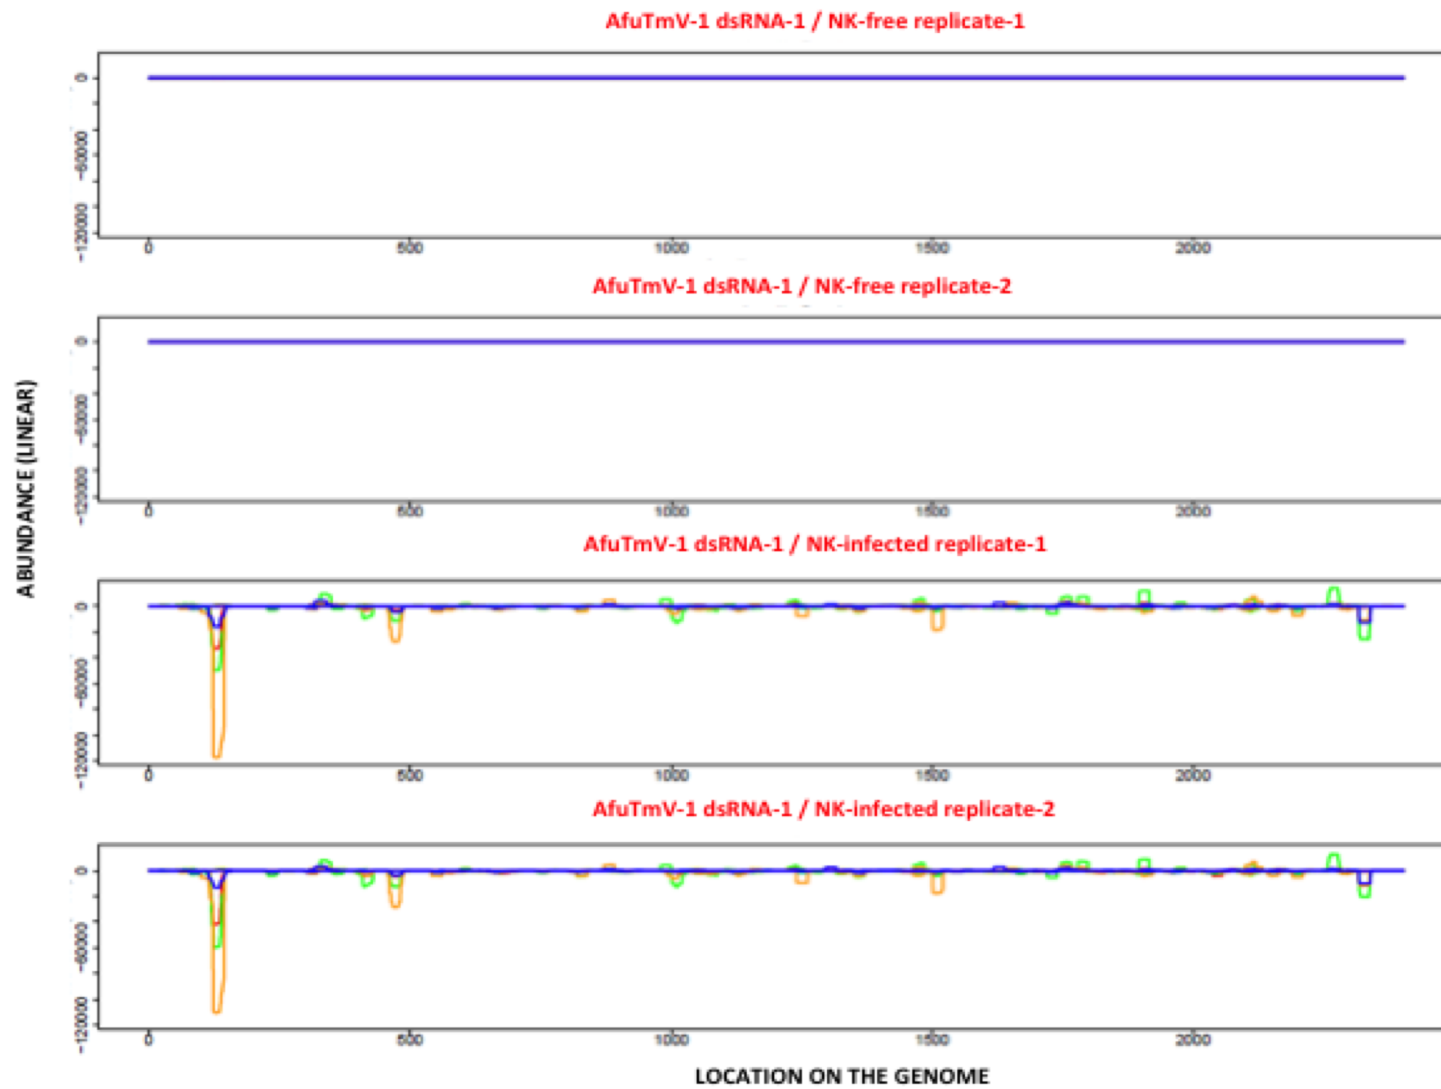

## B.2

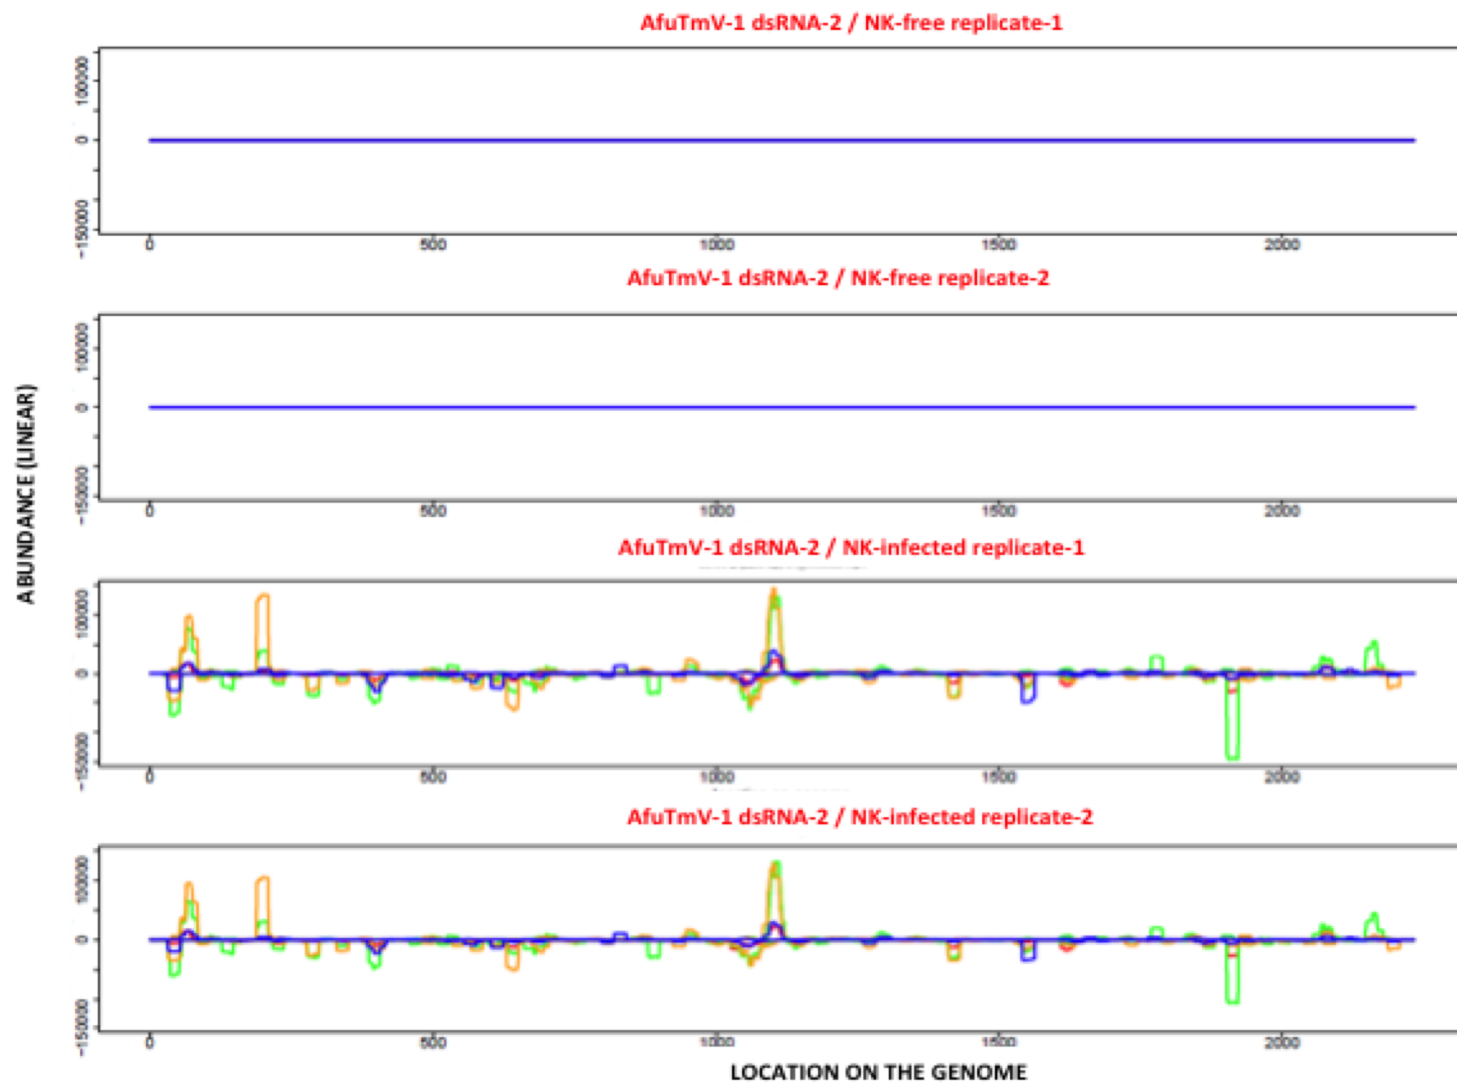

### B.3

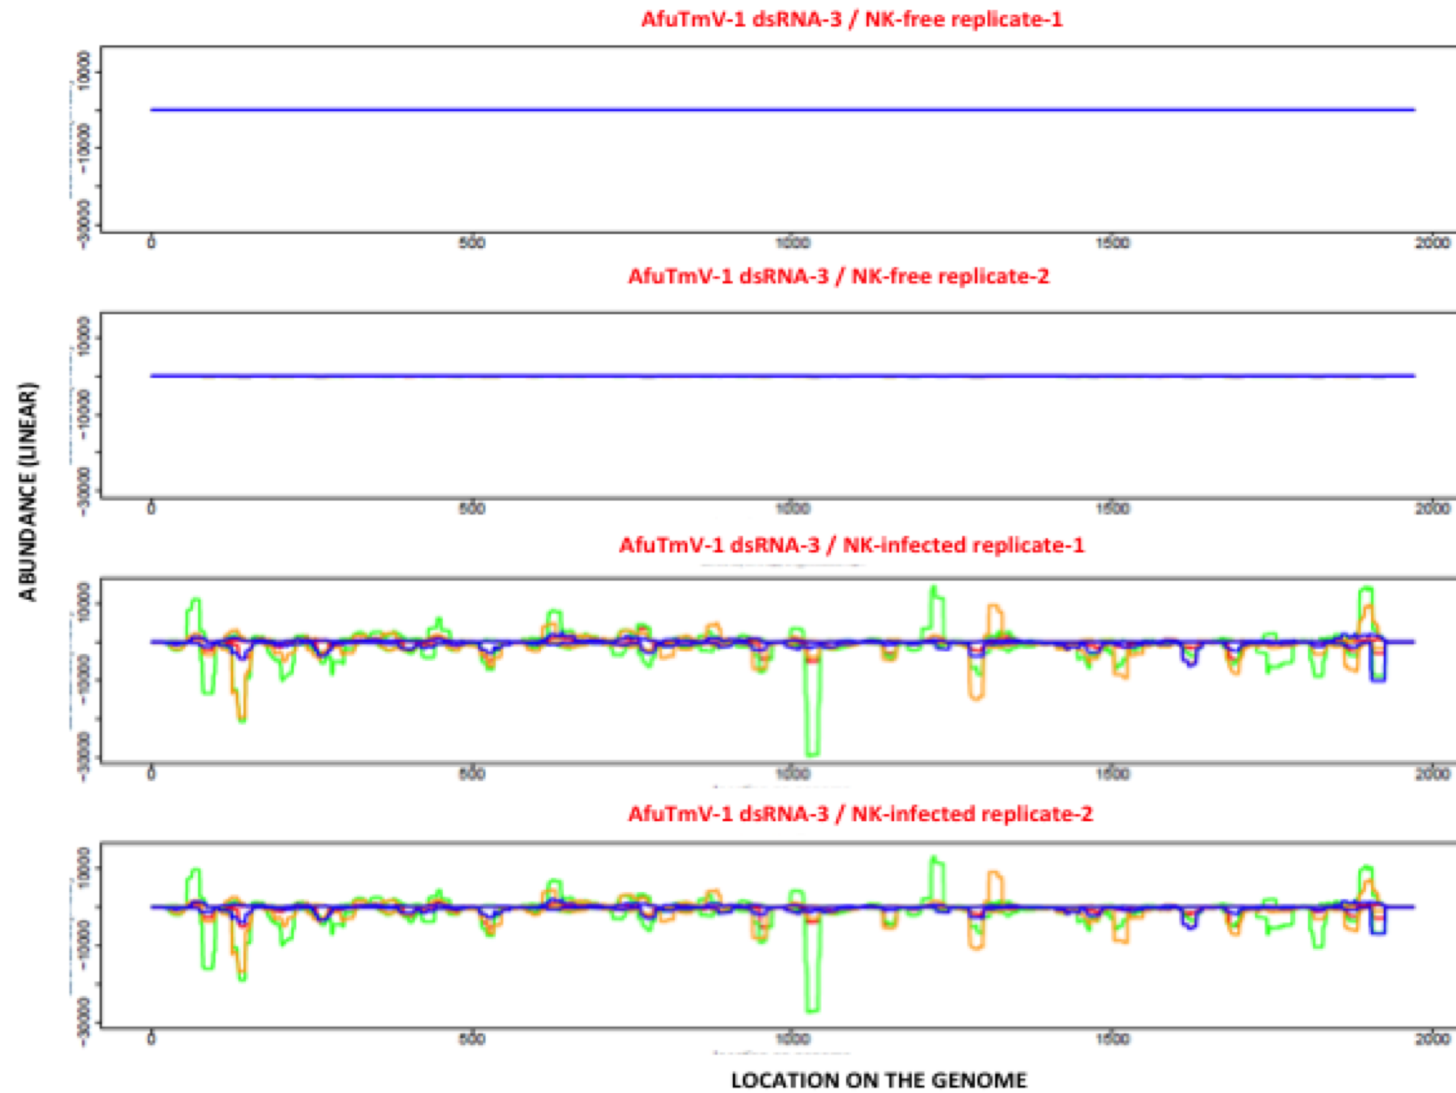

## B.4

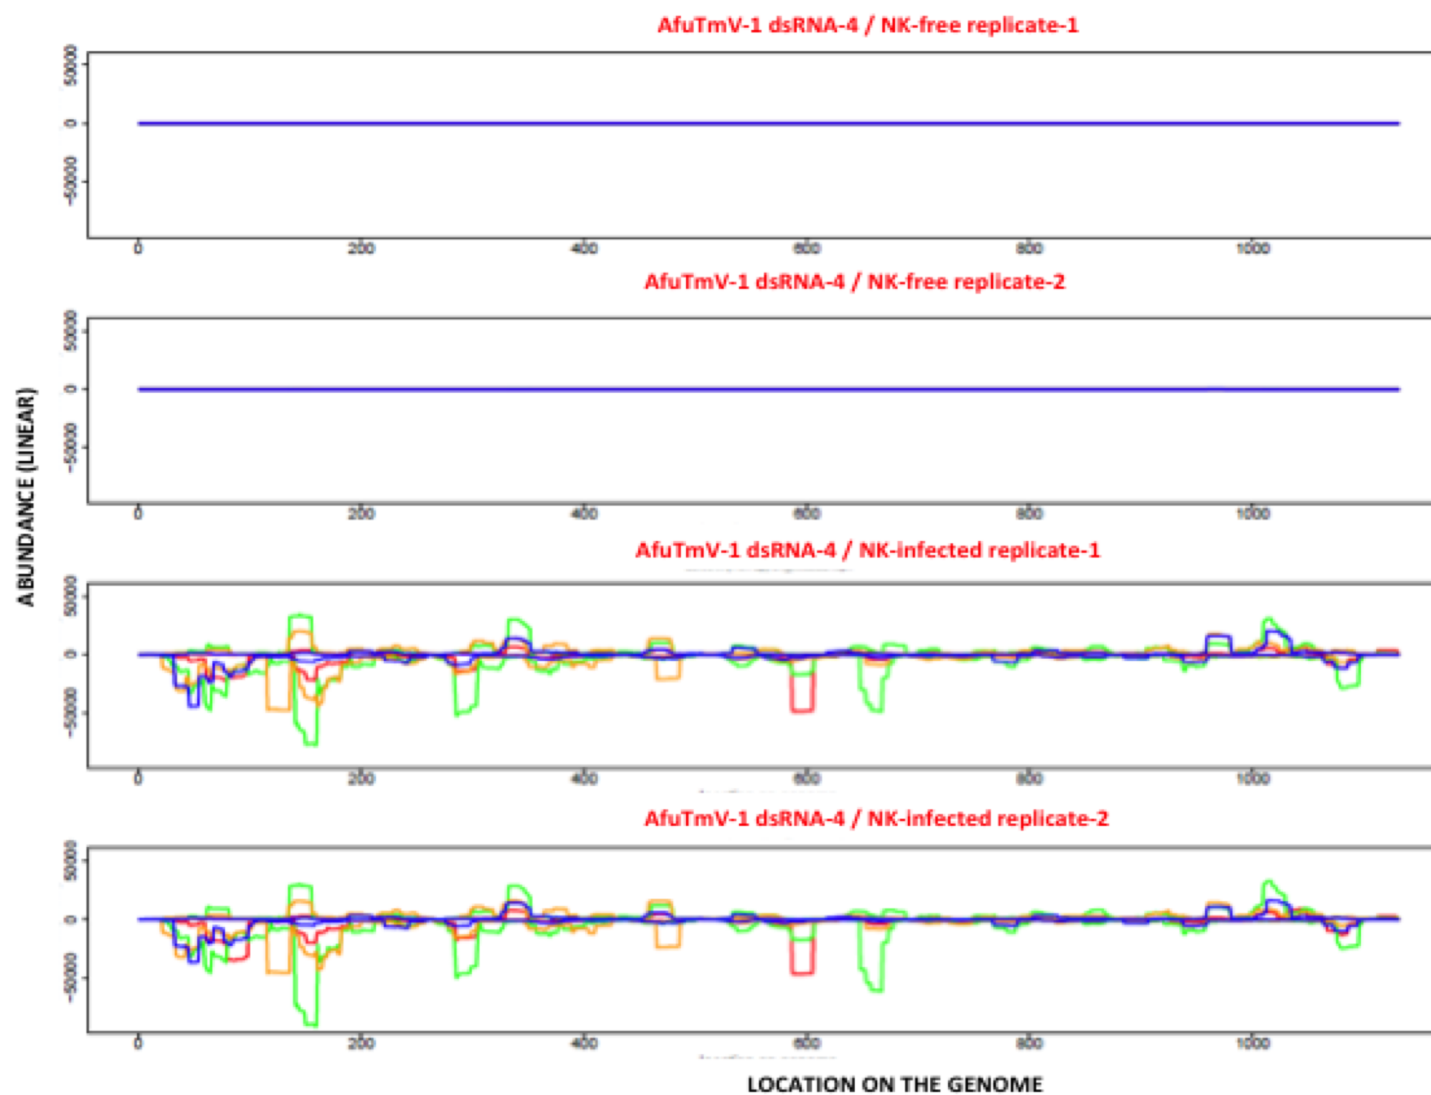

Supplement: 12864_2017_3773_MOESM3_ESM.pdf [file 12864_2017_3773_MOESM3_ESM.pdf]
