# Supplementary material for: Profile and functional analysis of small RNAs derived from Aspergillus fumigatus infected with double-stranded RNA mycoviruses
Source: PubMed Central journal article supplement (PMC5450132; doi:10.1186/s12864-017-3773-8), 2017-05-30
Supplement: 12864_2017_3773_MOESM4_ESM.pdf [file 12864_2017_3773_MOESM4_ESM.pdf]

| Probe name   | Location | sRNA sequence (5'→3')        | Probe sequence (5'→3')       |
|--------------|----------|------------------------------|------------------------------|
| U1-1 CONTROL | -        | TTCTTTGGCTCTATCCACTCTGTGGTGG | CCACCACAGAGTGGATAGAGCCAAAGAA |
| CV_probe_1   | dsRNA1   | TGACGTAGACATACCGAGAG         | CTCTCGGTATGTCTACGTCA         |
| CV_probe_2   | dsRNA1   | CAGAGTGCTGGGGACGTACC         | GGTACGTCCCAGACACTCTG         |
| CV_probe_3   | dsRNA2   | CGGTCCGATGGATCTGAGGCGTC      | GACGCCTCAGATCCATCGGACCG      |
| CV_probe_4   | dsRNA2   | GACGCCTCAGATCCATCGGACCG      | CGGTCCGATGGATCTGAGGCGTC      |
| NK_probe_1   | dsRNA1   | TGCACCCGTAGAGCTTGACG         | CGTCAAGCTCTACGGGTGCA         |
| NK_probe_2   | dsRNA1   | AGACAATGTCGGAGACGTAGG        | CCTACGTCTCCGACATTGTCT        |
| NK_probe_3   | dsRNA2   | TAGGGTGGCCCGGGACGAGC         | GCTCGTCCCGGGCCACCCTA         |
| NK_probe_4   | dsRNA4   | AGCGAGACGTCATCGACGGT         | ACCGTCGATGACGTCTCGCT         |
| NK_probe_5   | NK-LINE  | TGGTCGACGAACACGGATC          | GATCCGTGTTGTCGACCA           |
| PV_probe_1   | dsRNA1   | ACTCTCACGCACCCAAGGAT         | ATCCTTGGGTGCGTGAGAGT         |
| PV_probe_2   | dsRNA1   | TCTGGACGTTGCGAAGGGTGA        | TCACCCTTCGCAACGTCCAGA        |
| PV_probe_3   | dsRNA2   | CTGGACAAC TAGAGAGGCGGC       | GCCGCCTCTAGTTGTCCAG          |
| PV_probe_4   | dsRNA2   | GCCTTGAGATCCCACAGCGGAC       | GTCCGCTGTGGGATCTCAAGGC       |
| PV_probe_5   | PV-LINE  | TGCCTTGCCAGGCTTGAC           | GTCCAAGCCTGGCAAGGCA          |
