# Supplementary material for: Profile and functional analysis of small RNAs derived from Aspergillus fumigatus infected with double-stranded RNA mycoviruses
Source: PubMed Central journal article supplement (PMC5450132; doi:10.1186/s12864-017-3773-8), 2017-05-30
Supplement: 12864_2017_3773_MOESM5_ESM.pdf [file 12864_2017_3773_MOESM5_ESM.pdf]

|                      | <b>Probe</b>         | <b>Sequence</b>          | <b>Sequence Length (nt)</b> | <b>Abundance</b> |
|----------------------|----------------------|--------------------------|-----------------------------|------------------|
| <b>PV_infected_1</b> | PV_probe_1           | ACTCTCACGCACCCAAGGAT     | 20                          | 568              |
|                      | PV_probe_1           | TCCTTGGGTGCGTGAGAGT      | 19                          | 439              |
|                      | PV_probe_2           | TCTGGACGTTGCGAAGGGTGA    | 21                          | 164899           |
|                      | PV_probe_2           | TGGACGTTGCGAAGGGTGA      | 19                          | 25248            |
|                      | PV_probe_2           | TCTGGACGTTGCGAAGGGT      | 19                          | 16102            |
|                      | PV_probe_2           | TCTGGACGTTGCGAAGGGTG     | 20                          | 14785            |
|                      | PV_probe_2           | TCTGGACGTTGCGAAGGGTGC    | 21                          | 11010            |
|                      | PV_probe_3           | CTGGACAACACTAGAGAGGCCGGC | 21                          | 134509           |
|                      | PV_probe_3           | TGGACAACACTAGAGAGGCCGGC  | 20                          | 37337            |
|                      | PV_probe_3           | CTGGACAACACTAGAGAGGCCGG  | 20                          | 36302            |
|                      | PV_probe_3           | CTGGACAACACTAGAGAGGCCGGA | 21                          | 19210            |
|                      | PV_probe_4           | TCCGCTGTGGGATCTCAAGGC    | 21                          | 6286             |
|                      | PV_probe_4           | GCCTTGAGATCCCACAGCGGAC   | 22                          | 3333             |
|                      | PV_probe_5           | TGCCTTGCCAGGCTTGGAC      | 19                          | 1264             |
|                      | <b>PV_infected_2</b> | PV_probe_1               | ACTCTCACGCACCCAAGGAT        | 20               |
| PV_probe_1           |                      | TCCTTGGGTGCGTGAGAGT      | 19                          | 190              |
| PV_probe_2           |                      | TCTGGACGTTGCGAAGGGTGA    | 21                          | 90694            |
| PV_probe_2           |                      | TGGACGTTGCGAAGGGTGA      | 19                          | 14112            |
| PV_probe_2           |                      | TCTGGACGTTGCGAAGGGTG     | 20                          | 7452             |
| PV_probe_2           |                      | TCTGGACGTTGCGAAGGGT      | 19                          | 6782             |
| PV_probe_2           |                      | TCTGGACGTTGCGAAGGG       | 18                          | 1827             |
| PV_probe_3           |                      | CTGGACAACACTAGAGAGGCCGGC | 21                          | 43360            |
| PV_probe_3           |                      | TGGACAACACTAGAGAGGCCGGC  | 20                          | 12627            |
| PV_probe_3           |                      | CTGGACAACACTAGAGAGGCCGG  | 20                          | 7817             |
| PV_probe_3           |                      | CTGGACAACACTAGAGAGGCCGGA | 21                          | 5433             |
| PV_probe_4           |                      | TCCGCTGTGGGATCTCAAGGC    | 21                          | 2418             |
| PV_probe_4           |                      | GCCTTGAGATCCCACAGCGGAC   | 22                          | 1309             |
| PV_probe_5           |                      | TGCCTTGCCAGGCTTGGAC      | 19                          | 495              |
