# Supplementary material for: Profile and functional analysis of small RNAs derived from Aspergillus fumigatus infected with double-stranded RNA mycoviruses
Source: PubMed Central journal article supplement (PMC5450132; doi:10.1186/s12864-017-3773-8), 2017-05-30
Supplement: 12864_2017_3773_MOESM6_ESM.pdf [file 12864_2017_3773_MOESM6_ESM.pdf]

| Name     | Hairpin sequence                                                                                                                       | Mature sequence          | Probe sequence (5'→ 3')   | Annotation    | Differentially expressed in | Folding                                                                                                    |
|----------|----------------------------------------------------------------------------------------------------------------------------------------|--------------------------|---------------------------|---------------|-----------------------------|------------------------------------------------------------------------------------------------------------|
| miRCat_2 | CGCGGUCCUCCAC<br>GCCUCCAGACCAGC<br>GAGGGGCCCGGA<br>GGUCGAGACGGAA<br>ACCGUUGGUGGAG<br>AGGCCAGGAAGCG<br>GGUGAUGGCGUUGG<br>AGCUGAGACUGUCG | TGGCGTTGGAGCTGAGACTG     | CAGTCTCAGCTCCAACGCCA      | No annotation | CV infected                 | 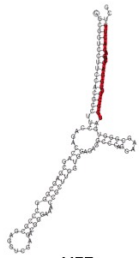 <p>MFE:<br/>-51.60</p> |
| FOLDED-2 | GUCAGAGCCUUGA<br>GGUUGUCUCCUGA<br>CAUGGUACUUGAAG<br>CUGAGCUUUGUC<br>AAAGAGGACCCAG<br>CCAACGCAAGUAA<br>GGCGAGUUGUAUUC<br>UCGGAGACUGUGAC | GAGTTGATTCTCGGAGACTGTGAC | GTCACAGTCTCCGAGAATAACAATC | LINes         | CV, NK, PV infected         |  <p>MFE:<br/>-36.80</p> |
