# Supplementary material for: Profile and functional analysis of small RNAs derived from Aspergillus fumigatus infected with double-stranded RNA mycoviruses
Source: PubMed Central journal article supplement (PMC5450132; doi:10.1186/s12864-017-3773-8), 2017-05-30
Supplement: 12864_2017_3773_MOESM8_ESM.pdf [file 12864_2017_3773_MOESM8_ESM.pdf]

**A**

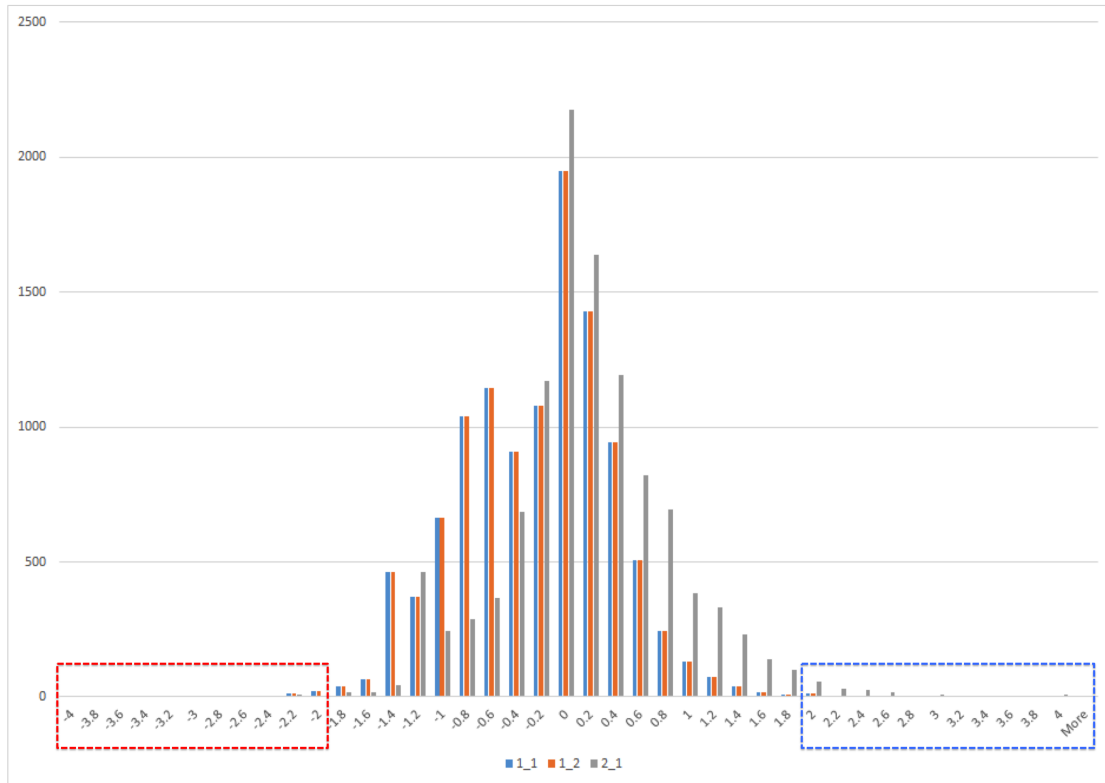

**Afu2g13260**  
**Afu3g3330**  
**Afu2g07670**  
**Afu3g03420, *sidD***  
**Afu3g08010, *ace1***

**Afu5g00730**  
**Afu5g02330, *aspf1***  
**Afu5g07600**  
**Afu8g06070**

**B**

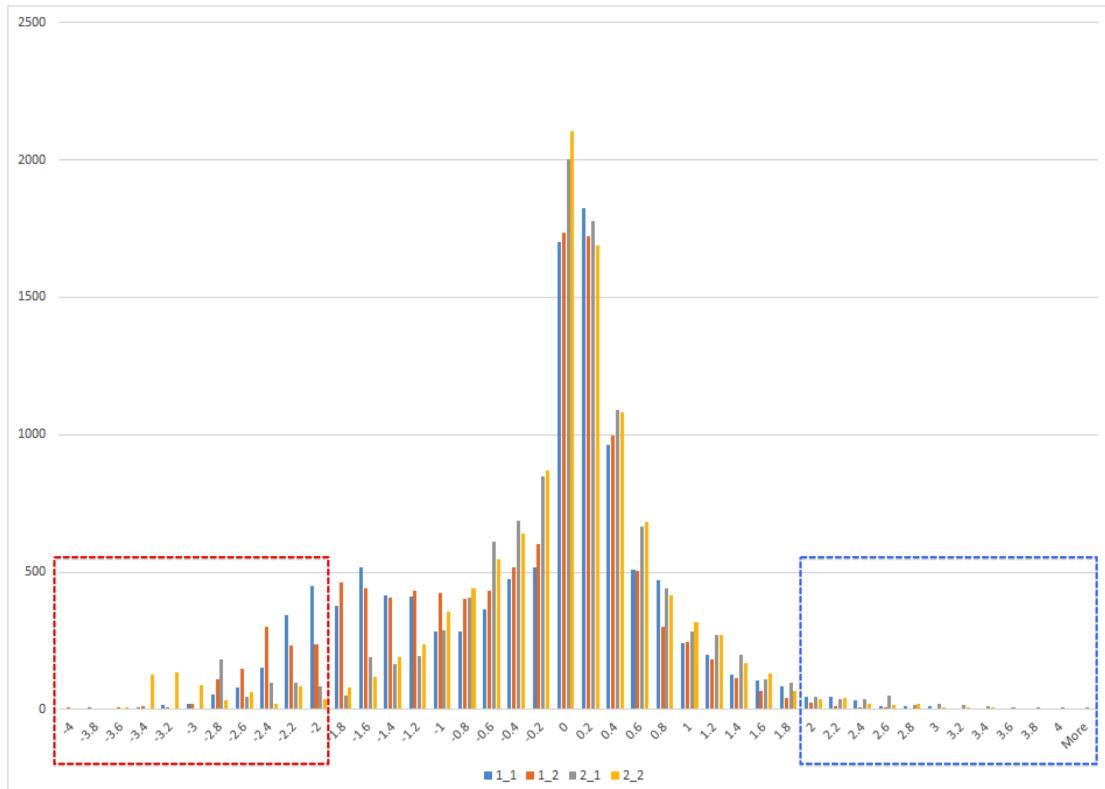

**Afu1g14540**  
**Afu2g05830**  
**Afu3g11960**  
**Afu5g12130, *rab7***  
**Afu5g02220, *lntF***

**Afu3g07870**  
**Afu4g11250, *cafA***  
**Afu5g12730, *nrps8***

**C**

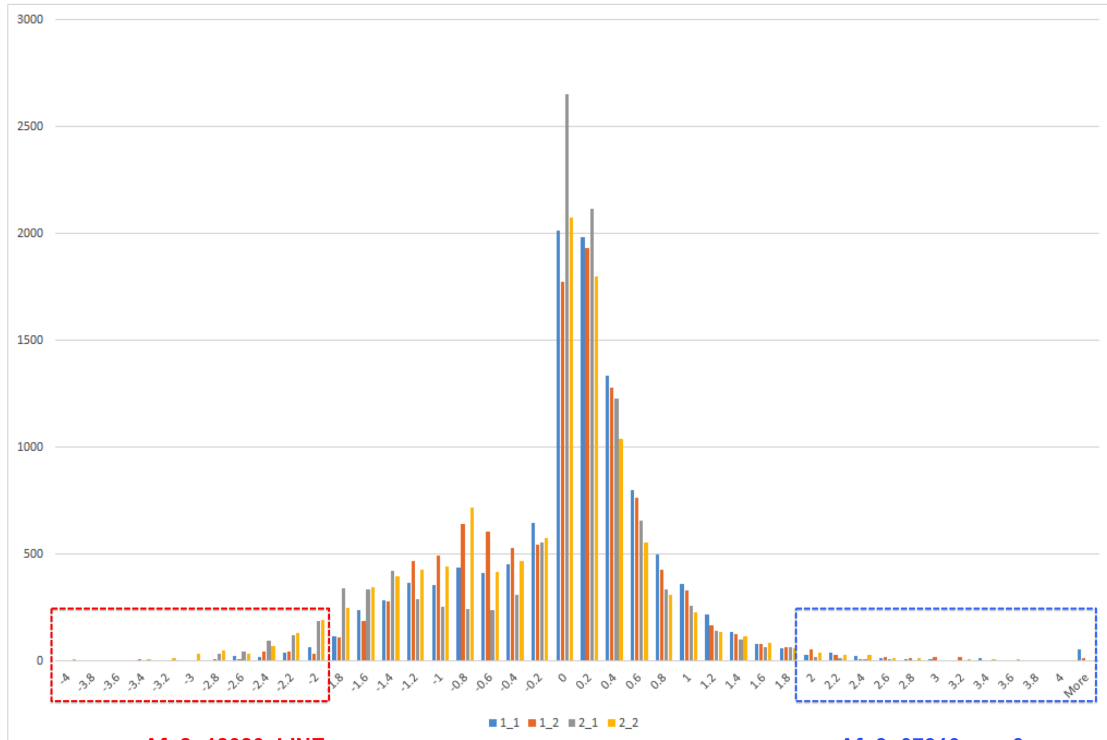

**Afu2g18080, LINE**  
**Afu5g00270, LINE**  
**Afu5g06560**  
**Afu8g01040, LINE**  
**Afu8g00310, LINE**  
**Afu8g04290, LINE**  
**Afu8g01040, LINE**

**Afu3g07910, *uge3***  
**Afu4g08370**  
**Afu6g07770**  
**Afu8g06070**
